# Supplementary material for: An Electrochemical Screen-Printed Sensor Based on Gold-Nanoparticle-Decorated Reduced Graphene Oxide–Carbon Nanotubes Composites for the Determination of 17-β Estradiol
Source: MDPI journal article supplement (doi:10.3390/bios13040491), 2023-04-19
Supplement: s1 [file s1]

## Supplementary Material

# **An Electrochemical Screen-Printed Sensor Based on Gold-Nanoparticle-Decorated Reduced Graphene Oxide–Carbon Nanotubes Composites for the Determination of 17- $\beta$ Estradiol**

**Auwal M. Musa <sup>1</sup>, Janice Kiely <sup>2</sup>, Richard Luxton <sup>2</sup> and Kevin C. Honeychurch <sup>1,2,\*</sup>**

<sup>1</sup> Institute of Bio-Sensing Technology (IBST), University of the West of England, Bristol BS16 1QY, UK;

<sup>2</sup> Centre for Research in Biosciences (CRIB), School of Applied Sciences, University of the West of England, Bristol BS16 1QY, UK

\* Correspondence: kevin.honeychurch@uwe.ac.uk; Tel.: +44-(0)1173287357

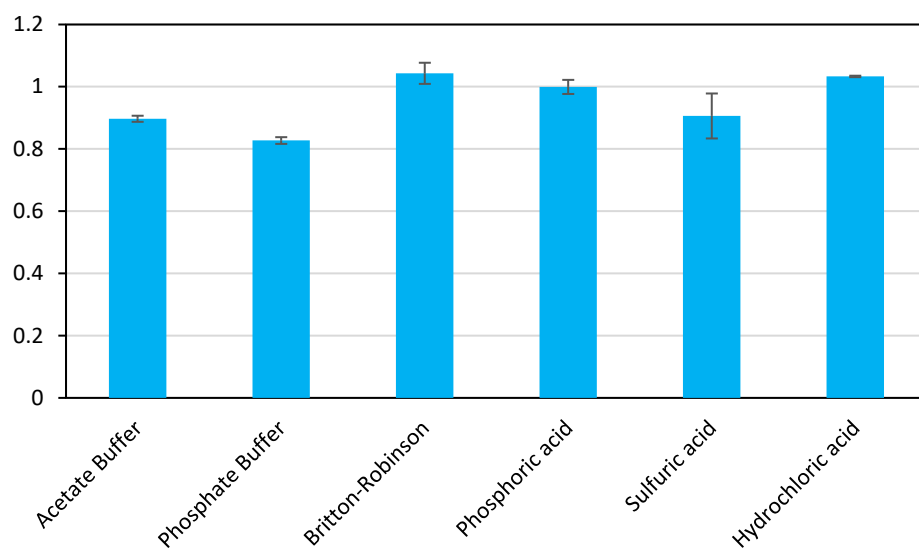

**Figure. S1.** Shows the peak currents in various supporting electrolytes.

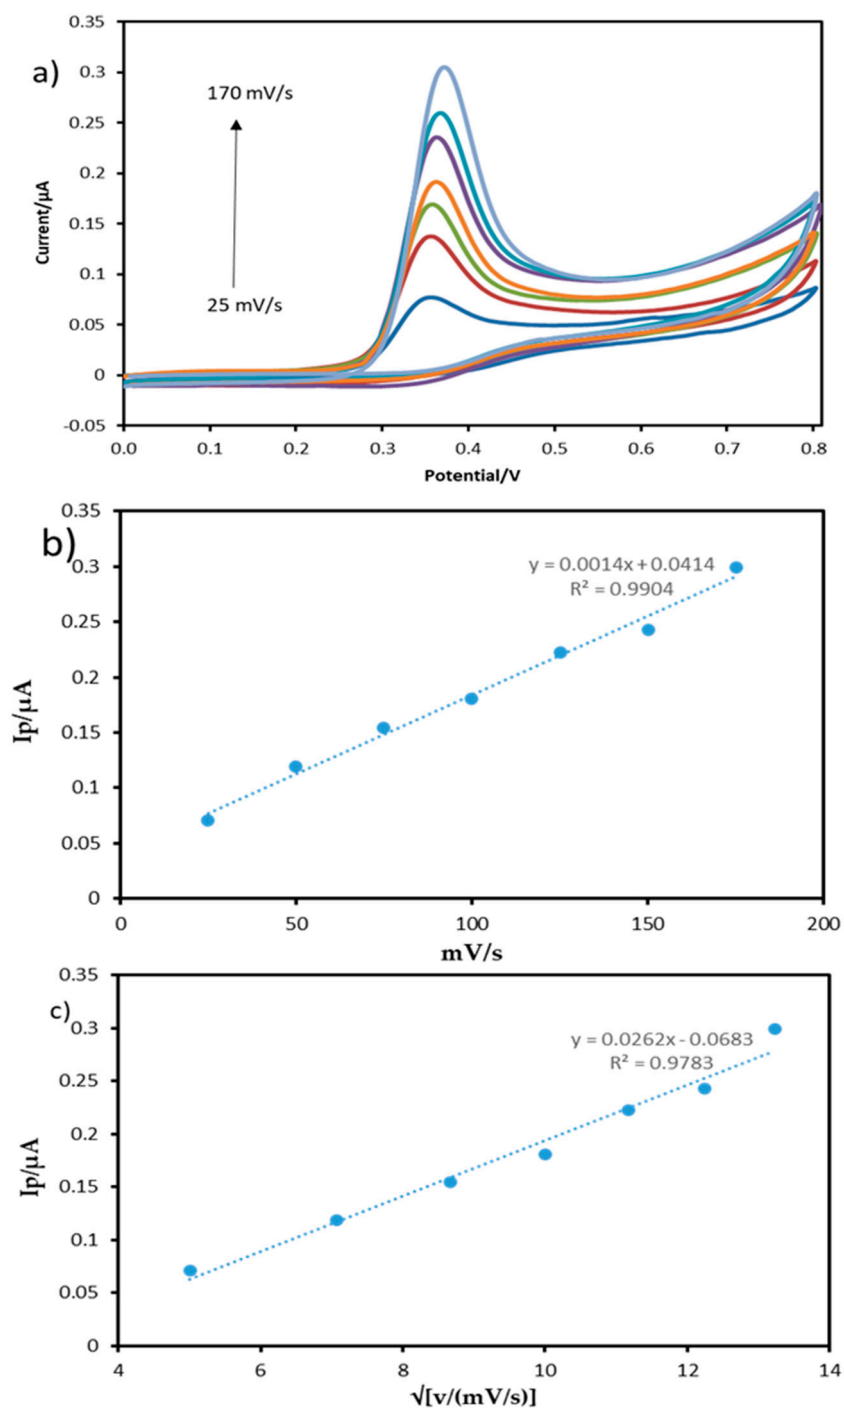

**Figure S2.** A) Cyclic voltammograms (CVs) of bare SPE in 20  $\mu\text{M}$  E2 at 25-170  $\text{mVs}^{-1}$  scan rate. b) Plot of current peak vs. scan rate. c) Plot of current peak vs. square root of scan rate.

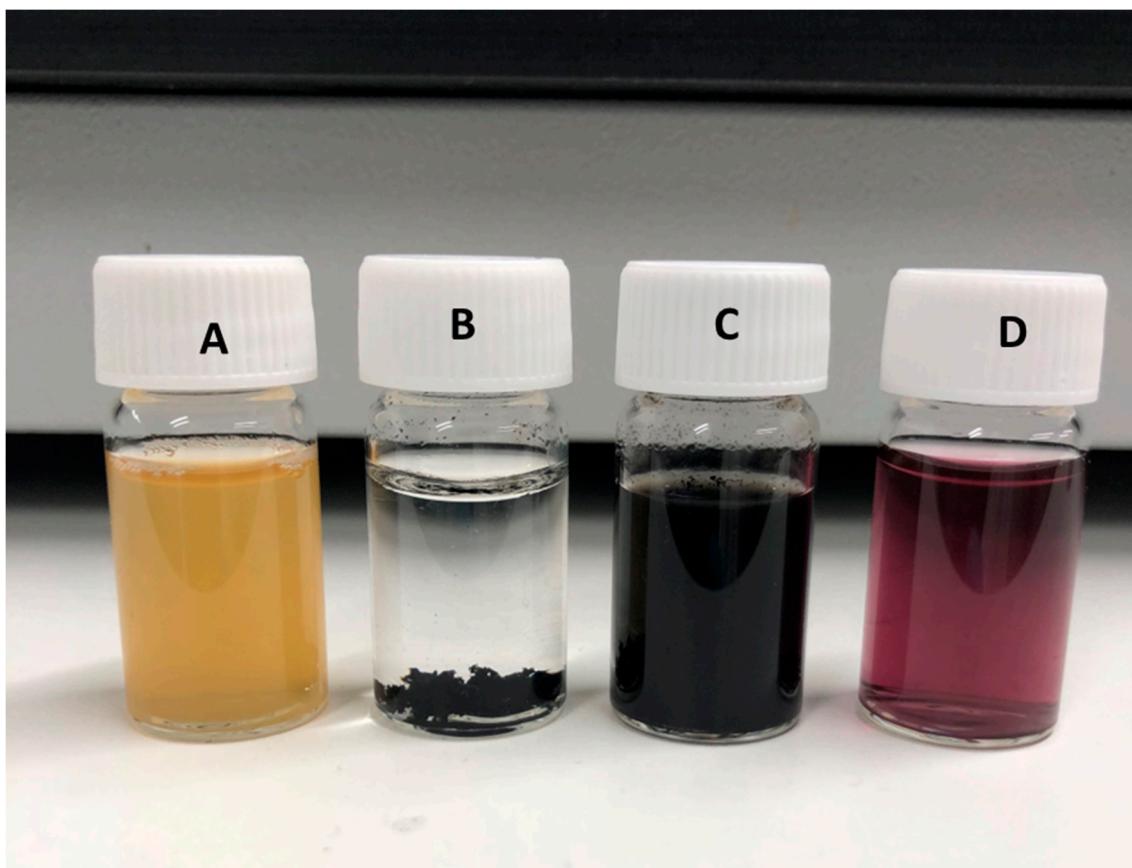

**Figure S3.** Photograph of (A) Bay leaf extract (B) carbon-nanotubes in water (C) Gold nanoparticle reduced/graphene Oxide-Carbon nanotubes D) Gold nanoparticle

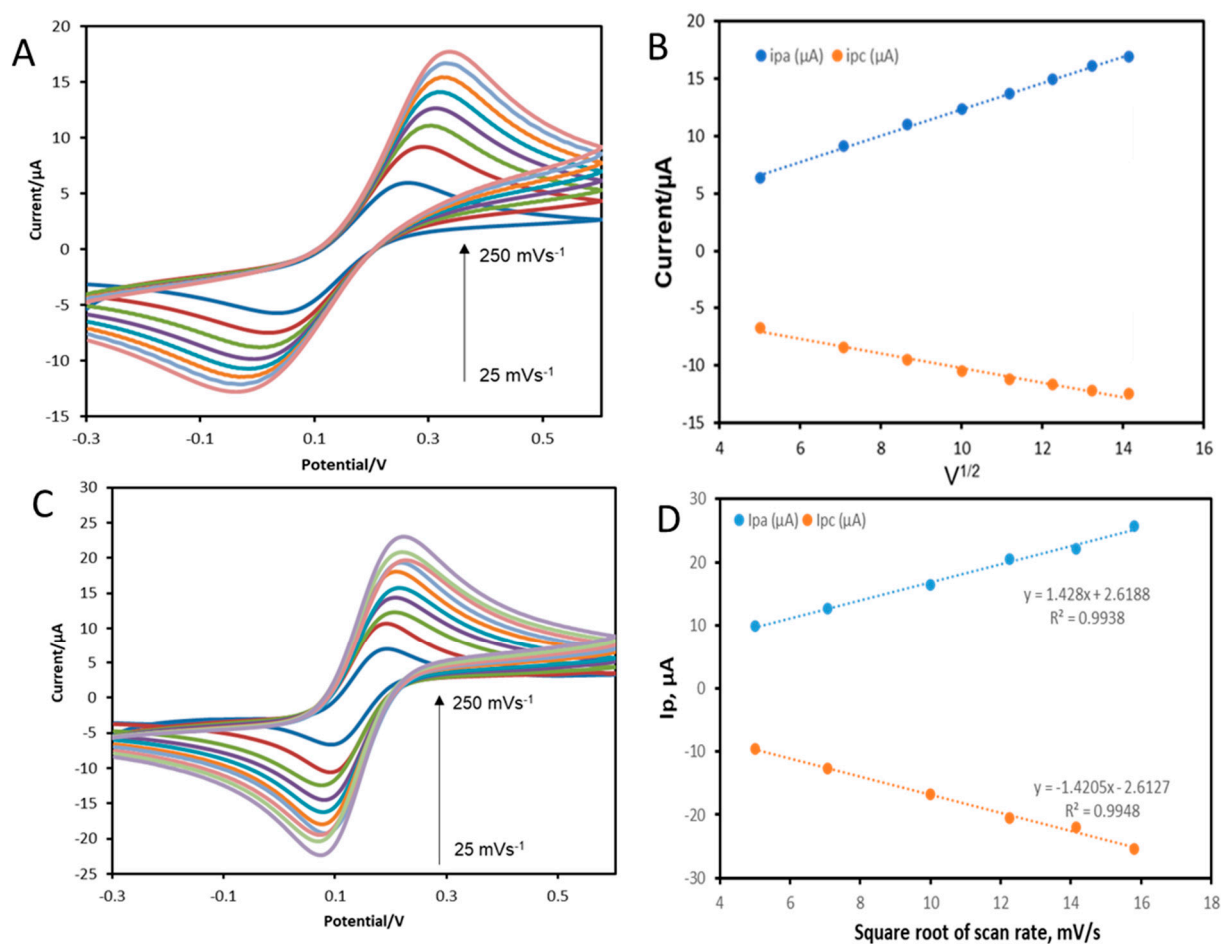

**Figure S5** (A) CV of Bare SPE immersed in 0.1 M KCl containing 5 mM  $[\text{Fe}(\text{CN})_6]^{3-/4-}$  at 100  $\text{mVs}^{-1}$  scan rate. (B) anodic current peak vs. square root of scan rate, and cathodic current peak vs. square root of scan rate of bare SPE. (C) CVs of rGO/CNT/SPE at different scan rates (25-200  $\text{mVs}^{-1}$ ) 0.1 M KCl containing 5 mM  $[\text{Fe}(\text{CN})_6]^{3-/4-}$ . (D) Anodic current peak vs. square root of scan rate, and cathodic current peak vs. square root of scan rate of rGO/CNT/SPE electrode

**Table S1.** Electroactive surface area vs. electrode composition.

| Electrode        | Electroactive<br>area |
|------------------|-----------------------|
| Bare SPE         | 0.009                 |
| GO-CNT           | 0.011                 |
| rGO-CNT          | 0.010                 |
| rGO-AuNP/CNT/SPE | 0.014                 |
| rGO-AuNP         | 0.007                 |

Abbreviations: Bare SPE: bare Screen printed electrode; GO-CNT: Graphene oxide-carbon nanotubes; rGO-CNT: Reduced graphene oxide-carbon nanotube; rGO-AuNP/CNT/SPE: gold nanoparticles-Reduced graphene oxide-carbon nanotube; rGO-AuNP: gold nanoparticles-Reduced graphene oxide

#### MatLab code

##### Baseline\_magic

```
function [C,B] = baseline_magic(X,Y,N,M)
%-----
%Function to take in x and y data from voltammetry scan, perform
%automatic baseline fitting and output baseline and baseline-corrected data
%-----
%AUTHOR: David Ferrier
%DATE: 01/11/19
%-----
%INPUTS:
%X - x-axis data (potential)
%Y - y-axis data (current)
```

```

%N - order of polynomial for fitting
%M - number of iterations
%-----
%OUTPUTS:
%C - baseline corrected data
%B - baseline
%-----
%-----
%Determine whether data is from a forward or reverse scan (positive =
%forward, negative = reverse)
direction = X(end,1)-X(1,1);
%-----
%-----
%Find baseline
Y_0 = Y;
for ind = 1:M
    P = polyfit(X,Y,N);    %perform least-squares fit to data
    F = fit_fill(P,X);
    Y = fit_shift(Y,F,direction);    %adjust data based on fit
end
B = F;
%-----
%-----
%Apply baseline correction to current data
C = correction(Y_0,F);
%-----
end
%-----
%SUBROUTINES
%-----
function F = fit_fill(P,X)
%-----
%Subroutine to create fit dataset based on least-sqaure fit parameters

```

```

%-----

L = length(X);
N = length(P) - 1;
F = zeros(L,1);
for ind = 1:L
    fu = 0;
    for dni = 1:N+1
        tvar = P(1,dni)*X(ind,1)^(N-(dni-1));
        fu = fu + tvar;
    end
    F(ind,1) = fu;
end
end

%-----
%-----

function F_prime = fit_shift(Y,F,direction)
%-----
%Subroutine to create adjusted dataset based on current iteration fit
%-----

L = length(Y);
F_prime = zeros(L,1);
if direction>0    %forward scan
    for ind = 1:L
        if Y(ind,1)>=F(ind,1)
            F_prime(ind,1) = F(ind,1);
        else
            F_prime(ind,1) = Y(ind,1);
        end
    end
else              %reverse scan

    for ind = 1:L
        if Y(ind,1)<=F(ind,1)

```

```

        F_prime(ind,1) = F(ind,1);
    else
        F_prime(ind,1) = Y(ind,1);
    end
end

end

end

%-----
%-----

function Y_prime = correction(Y,F)
%-----
%Subroutine to create baseline corrected dataset
%-----
L = length(Y);
Y_prime = zeros(L,1);
for ind = 1:L
    Y_prime(ind,1) = Y(ind,1) - F(ind,1);
end
end

%-----
%-----

DPV_baseline

%-----

%DPV_baseline

%Script to load DPV data and run baseline_magic

%-----

%-----

%Load data file

```

```

input = 'Test_1';

fname = [input '.xlsx'];

dat = readmatrix(fname);

%-----

%-----

%Call baseline_magic for forward and reverse scans

N = 6;      %Order of polynomial for fitting purposes

M = 1000;   %Number of iterations

D = dat(3:end,:);

[C,B] = baseline_magic(D(:,1),D(:,2),N,M);

%-----

%-----

%Plot original data alongside baseline fit

figure

subplot(1,2,1);

plot(D(:,1),D(:,2),'b',D(:,1),B,'r')

title('DPV data')

xlabel('Potential/V')

ylabel('Current/\mu A')

%-----

%Plot baseline corrected data

subplot(1,2,2);

```

```

plot(D(:,1),C,'b')

title('Baseline corrected data')

xlabel('Potential/V')

ylabel('Current/\muA')

%-----

%-----

%write output to file

output = zeros(length(D),4);

output(:,1) = D(:,1);

output(:,2) = D(:,2);

output(:,3) = B;

output(:,4) = C;

output_prime{1,1} = 'Potential (V)';

output_prime{1,2} = 'Current (uA)';

output_prime{1,3} = 'Baseline';

output_prime{1,4} = 'Corrected';

fnameout = [input '_BLcorrected' '.xlsx'];

writecell(output_prime,fnameout,'Sheet',1,'Range','A1')

writematrix(output,fnameout,'Sheet',1,'Range','A2')

%-----

%-----

%-----

```
